# Supplementary material for: Light-induced morphological transition between unconjugated bilirubin photoisomers
Source: Royal Society of Chemistry journal article supplement (doi:10.1039/c8sm01801d), 2018-01-01
Supplement: c8sm01801d1.pdf [file c8sm01801d1.pdf]

## **Supporting Information**

# **Light-induced morphological transition between unconjugated bilirubin photoisomers†**

Siddhartha Pal, Pavel Banerjee, Dipankar Mondal and Nilmoni Sarkar\*

*Department of Chemistry, Indian Institute of Technology, Kharagpur 721302, West Bengal,  
India.*

**\*Corresponding Author: Nilmoni Sarkar**

**E-mail: [nilmoni@chem.iitkgp.ernet.in](mailto:nilmoni@chem.iitkgp.ernet.in)**

**Fax: 91-3222-255303**

## Contents

1. **Fig. S1** (a) Ground state electronic spectra of UCB (0.1 mM) with incremental illumination time (470 nm); (b) room temperature excitation and fluorescence spectra of UCB (0.1 mM) and (c) fluorescence spectra of UCB (0.1 mM) with incremental illumination time (470 nm).
2. **Fig. S2** (a) FLIM images of UCB (0.3 mM and 0.5 mM) and (b) corresponding 470 nm irradiated of UCB images.
3. **Fig. S3**: (a) ESI-MS spectra of UCB; before (left) and after (right) blue light irradiation and (b) reversed-phase HPLC analyses of the UCB before and after 10 min blue light (470 nm) irradiation.
4. **Fig. S4** Solution state elongated morphology formation of UCB under FILM microscope.
5. **Fig. S5** <sup>1</sup>HNMR spectra of a) UCB (0.05 mM) and (b) illuminated (470 nm light, 10 min) UCB in dms<sub>o</sub>-d<sub>6</sub>.
6. **Fig. S6** (a) FLIM images of BDT (all scale bar is 3 μm); (b) FLIM images of illuminated BDT by 470 nm light (all scale bar is 3 μm); (c) their corresponding lifetime distribution histograms; (d) FESEM images of BDT; (e) FESEM images of illuminated BDT by 470 nm light.
7. **Fig. S7** Two-photon excitation setup and sample collection.
8. **Fig. S8** (a) (i) FLIM study of unconjugated bilirubin illuminated by two-photon ( $\lambda_{\text{ex}} = 940$  nm) excitation and (ii) their corresponding zoom images (all scale bar is 3 μm); (b) lifetime distributions of 0.1 mM UCB with increasing two-photon ( $\lambda_{\text{ex}} = 940$  nm) exposure time and (c) their corresponding absorbance study.
9. **Fig. S9** FESEM images of illuminated UCB by two-photon irradiation ( $\lambda_{\text{ex}} = 940$  nm).
10. **Scheme S1** Plausible aggregation pattern and molecular packing for two different morphologies of UCB photoisomers.

## Supporting Figures

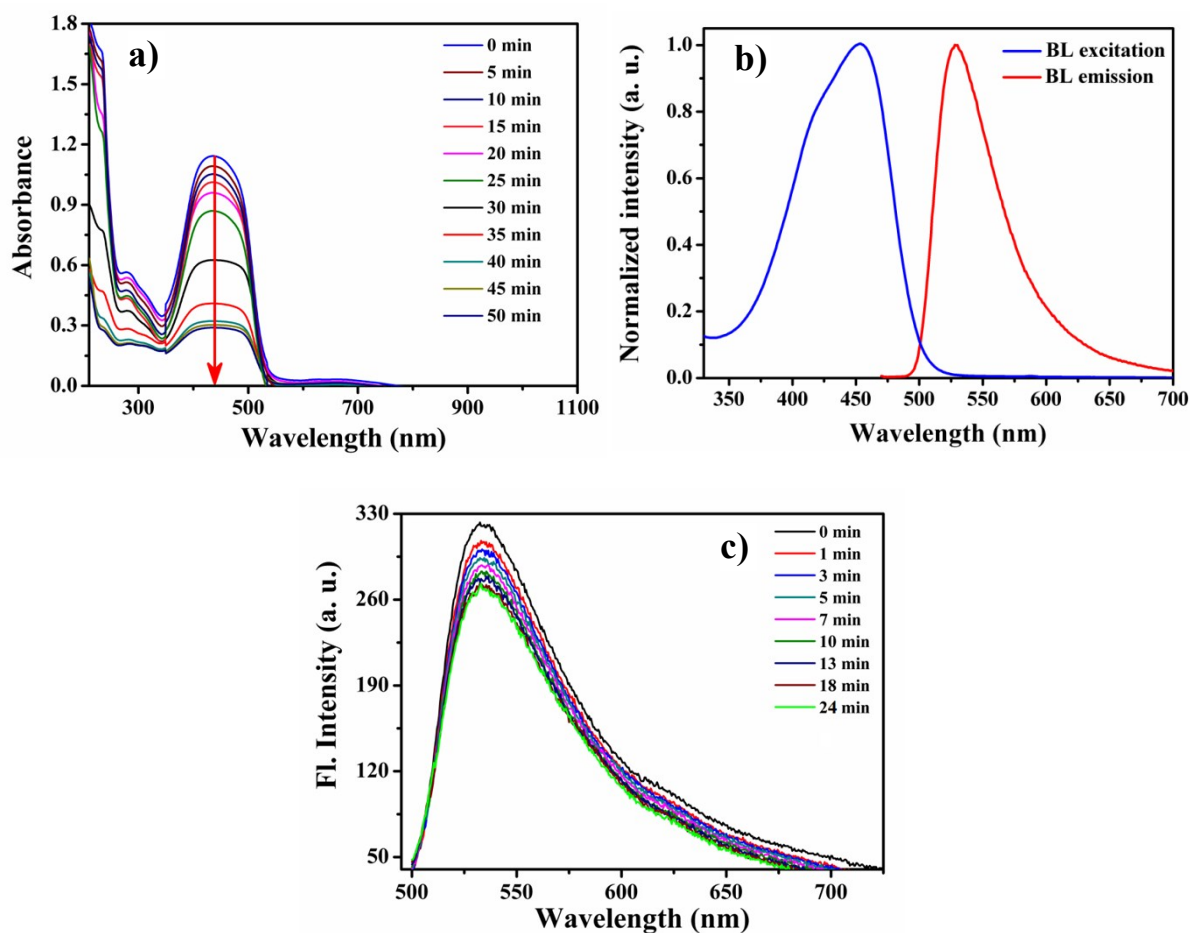

**Fig. S1** (a) Ground state electronic spectra of UCB (0.1 mM) with incremental illumination time (470 nm); (b) room temperature excitation and fluorescence spectra of UCB (0.1 mM) and (c) fluorescence spectra of UCB (0.1 mM) with incremental illumination time (470 nm).

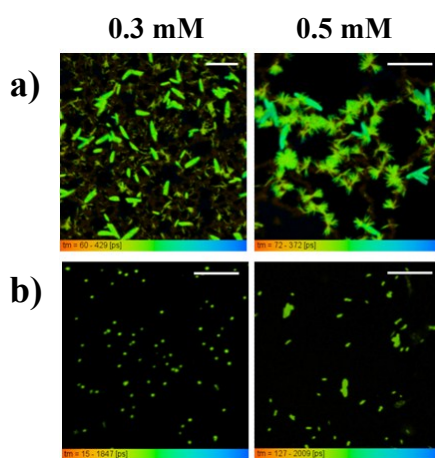

**Fig. S2** (a) FLIM images of UCB (0.3 mM and 0.5 mM) and (b) corresponding 470 nm irradiated of UCB images.

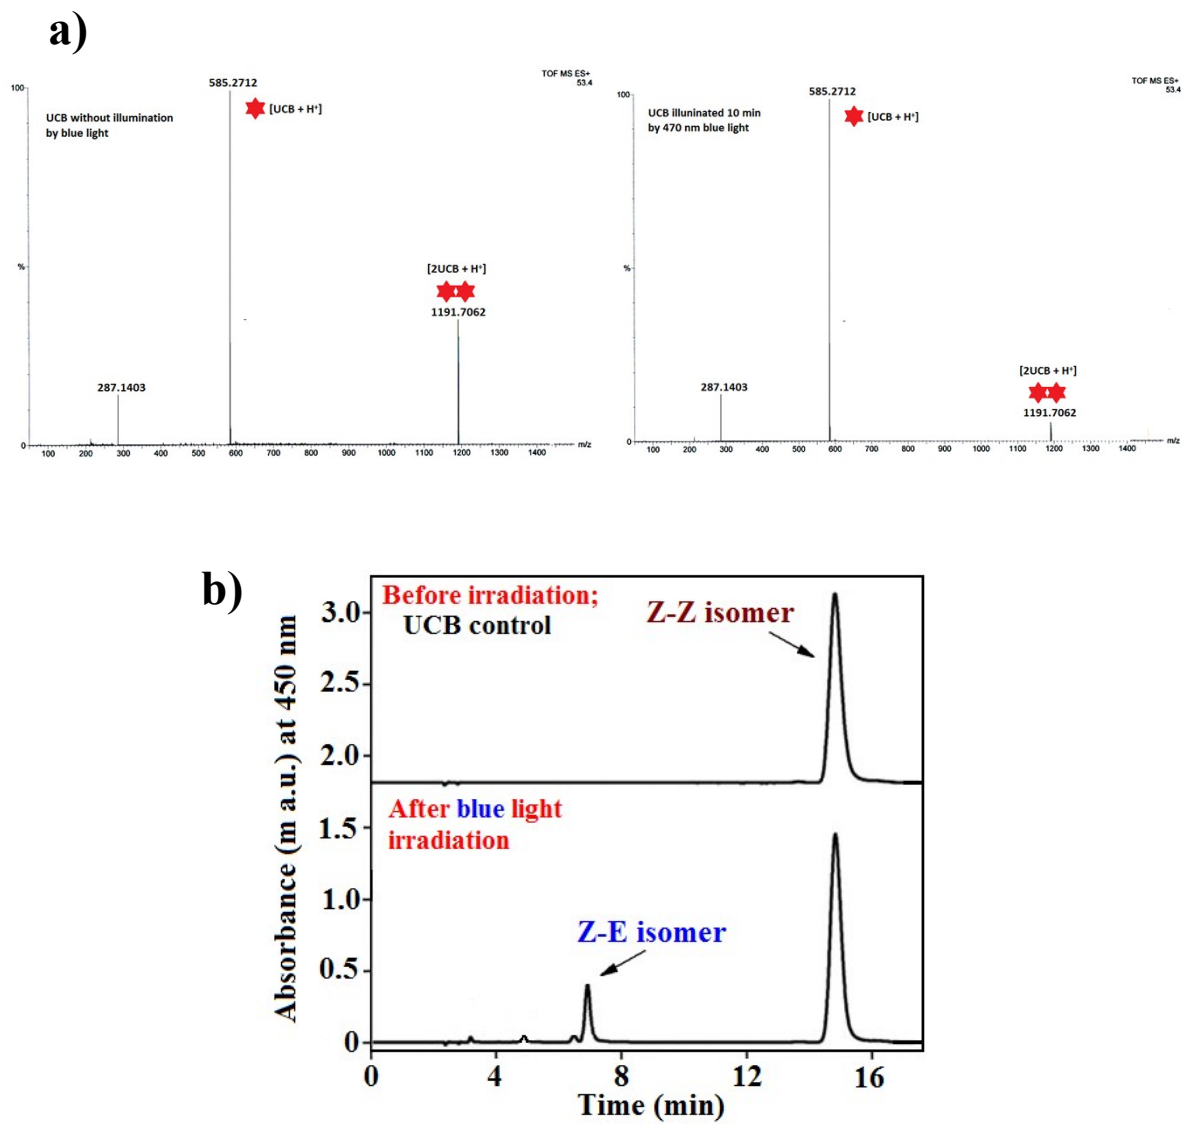

**Fig S3:** (a) ESI-MS spectra of UCB; before (left) and after (right) blue light irradiation and (b) reversed-phase HPLC analyses of the UCB before and after 10 min blue light (470 nm) irradiation.

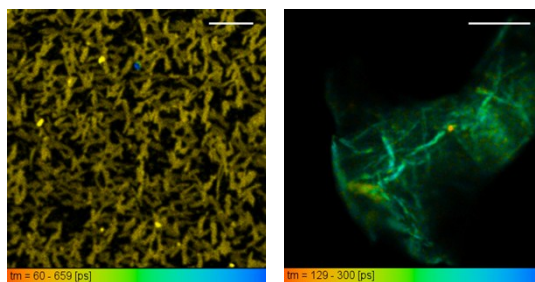

**Fig. S4** Solution state elongated morphology formation of UCB under FILM microscope.

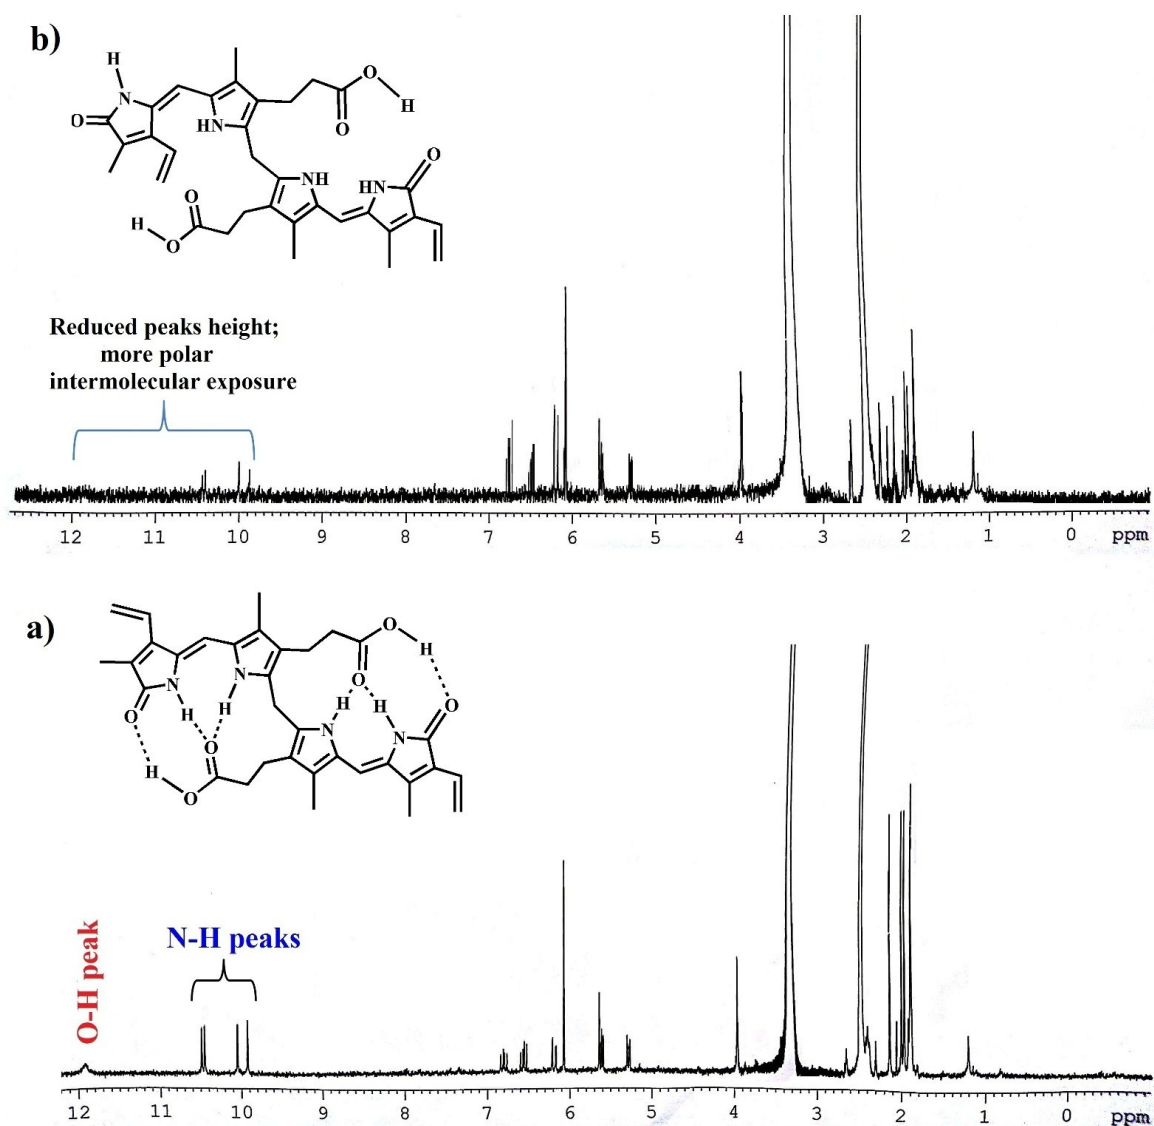

**Fig. S5**  $^1\text{H}$ NMR spectra of (a) UCB (0.05 mM) and (b) illuminated (470 nm light, 10 min) UCB in  $\text{dms}\text{-d}_6$ .

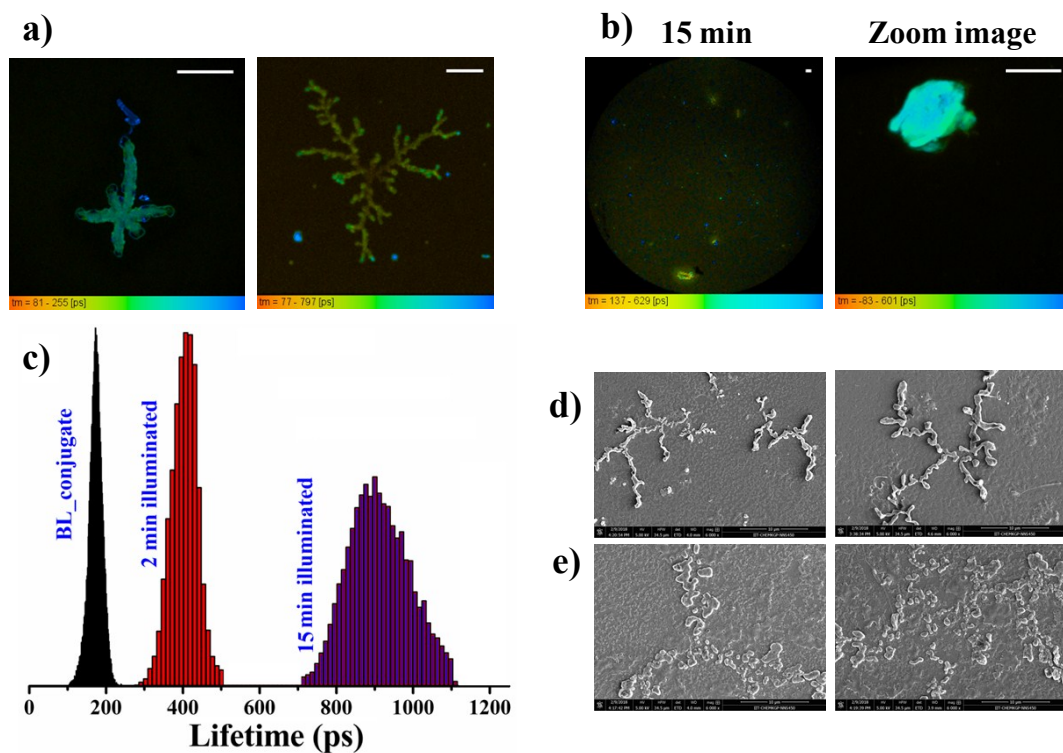

**Fig. S6** (a) FLIM images of BDT (all scale bar is 3 μm); (b) FLIM images of illuminated BDT by 470 nm light (all scale bar is 3 μm); (c) their corresponding lifetime distribution histograms; (d) FESEM images of BDT; (e) FESEM images of illuminated BDT by 470 nm light.

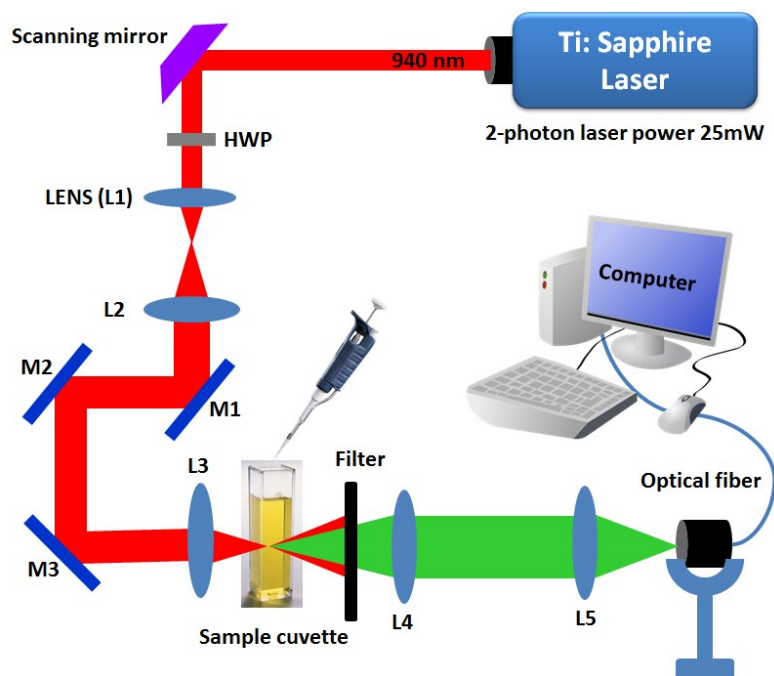

**Fig. S7** Two-photon excitation setup and sample collection.

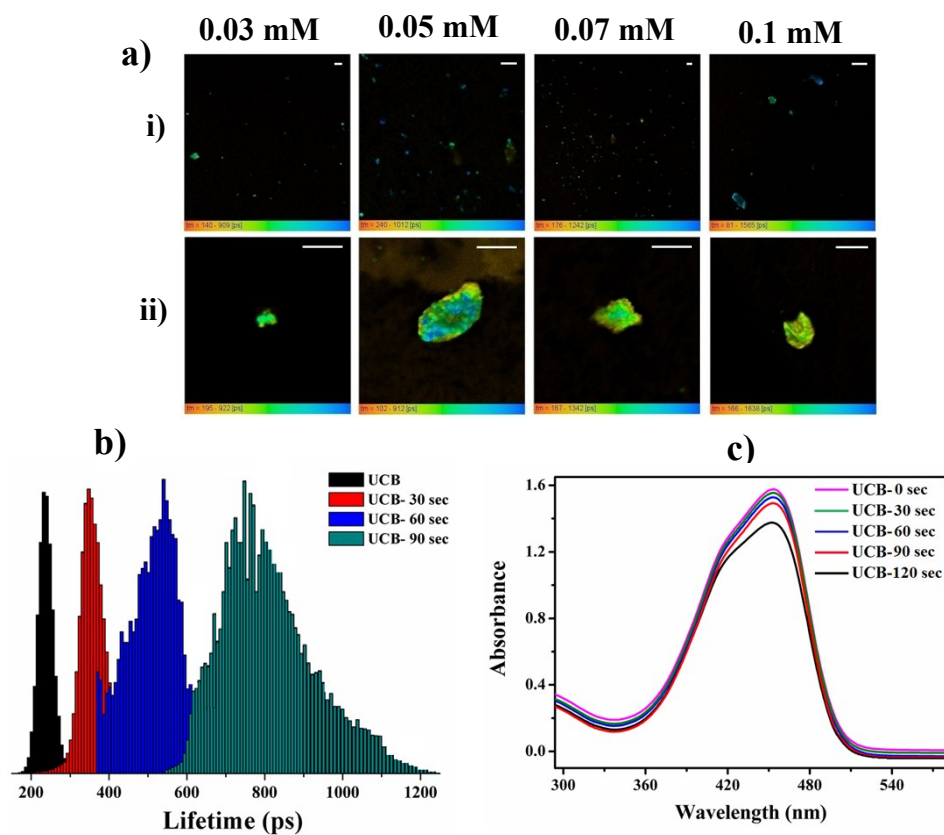

**Fig. S8** (a) (i) FLIM study of unconjugated bilirubin illuminated by two-photon ( $\lambda_{\text{ex}} = 940$  nm) excitation and (ii) their corresponding zoom images (all scale bar is  $3 \mu\text{m}$ ); (b) lifetime distributions of  $0.1 \text{ mM}$  UCB with increasing two-photon ( $\lambda_{\text{ex}} = 940$  nm) exposure time and (c) their corresponding absorbance study.

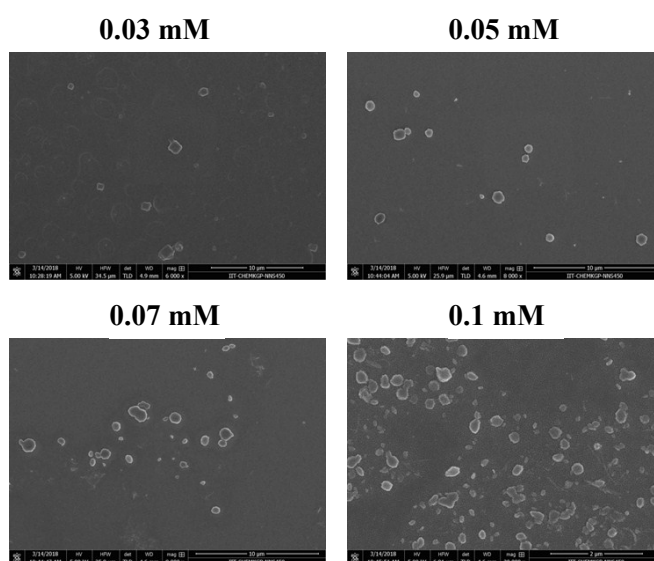

**Fig. S9** FESEM images of illuminated UCB by two-photon irradiation ( $\lambda_{\text{ex}} = 940$  nm).



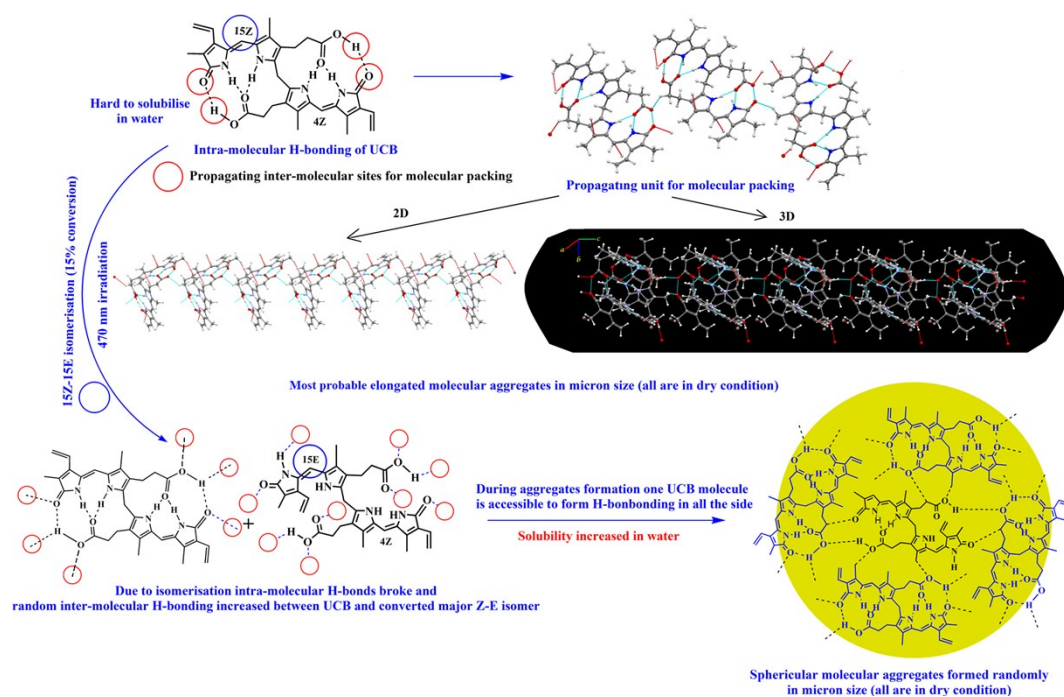

**Scheme S1** Plausible aggregation pattern and molecular packing for two different morphologies of UCB photoisomers.
